# Supplementary material
Source: MDPI journal article supplement (https://www.mdpi.com/1424-2818/15/4/560)
Supplement: s1 [file s1]

## Supporting information

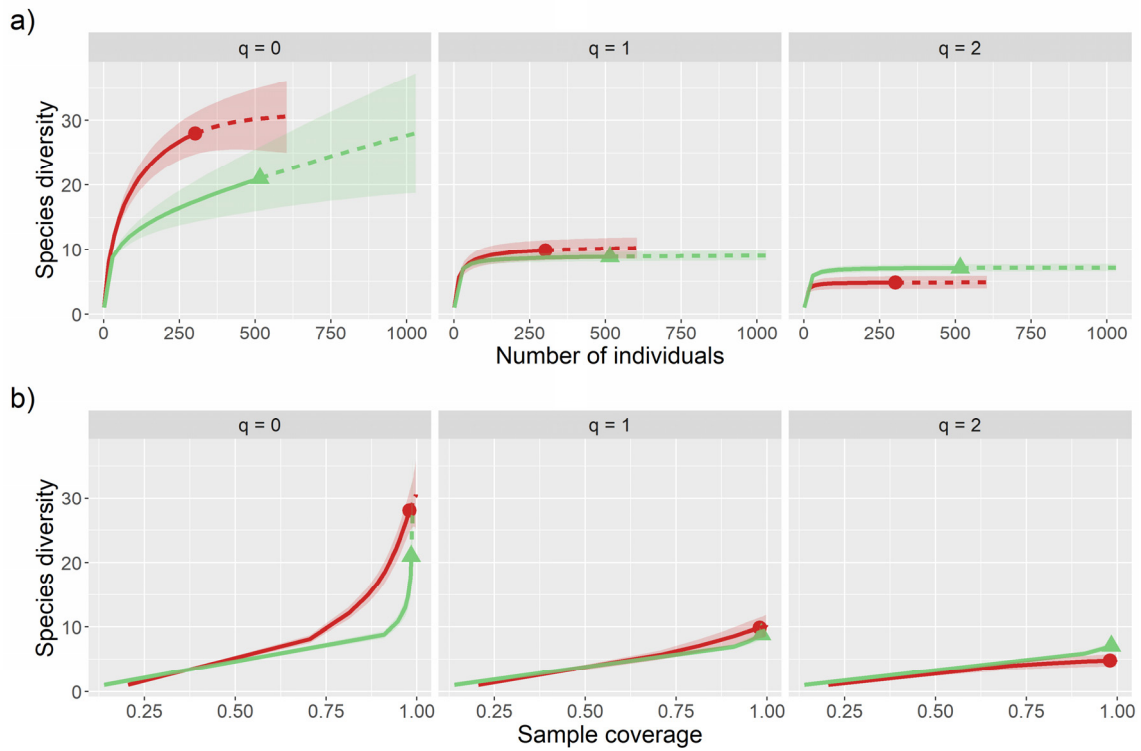

**Figure S1.** Rarefaction (solid lines) and extrapolation (dashed lines, up to double the reference sample size) curves for fruit-feeding butterflies species diversity based on the Hill numbers for the canopy (red line) and the understory (green line). The 95% confidence intervals (shaded regions) were obtained by a bootstrap method based on 1000 replications. (a) Sample-size-based curves and (b) Coverage-based curves.

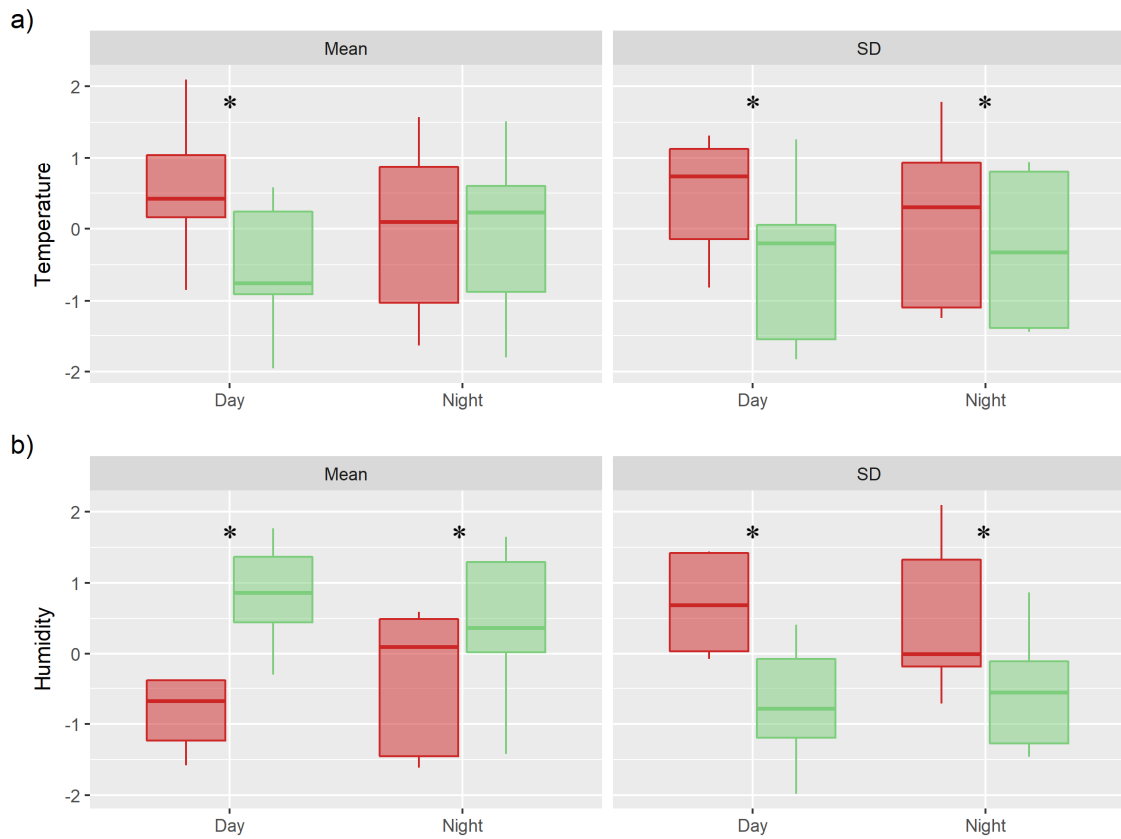

**Figure S2.** Relationship between environmental variables and vertical stratum for a subtropical forest in the Rio Grande do Sul State, southern Brazil, considering the day and night periods (day = between 8h00min and 18h00min; night = 18h30min to 7h30min). (a) Scaled temperature values, and (b) scaled humidity values. Asterisk represents a significant difference between environmental variables values in canopy (red plots) and understory (green plots). SD, standard deviation.

**Table S1.** List of species of the fruit-feeding butterflies sampled in a Mixed Ombrophilous Forest in southern Brazil between November 2016-March 2017 and October 2017-March 2018.

| Subfamily/Tribe/Species                                | Canopy     | Understory | Total      |
|--------------------------------------------------------|------------|------------|------------|
| <b>Biblidinae</b>                                      | <b>41</b>  | <b>6</b>   | <b>47</b>  |
| Ageroniini                                             |            | 1          | 1          |
| <i>Hamadryas epinome</i> (C. Felder & R. Felder, 1867) |            | 1          | 1          |
| Callicorini                                            | 7          | 1          | 8          |
| <i>Diaethria candrena</i> (Godart, [1824])             | 5          | 1          | 6          |
| <i>Diaethria clymena</i> (Cramer, 1775)                | 2          |            | 2          |
| Catonephelini                                          | 1          |            | 1          |
| <i>Eunica eburnea</i> Fruhstorfer, 1907                | 1          |            | 1          |
| Epiphilini                                             | 33         | 4          | 37         |
| <i>Epiphile hubneri</i> Hewitson, 1861                 | 14         | 2          | 16         |
| <i>Epiphile orea</i> (Hübner, [1823])                  | 19         | 1          | 20         |
| <i>Temenis laothoe</i> (Cramer, 1777)                  |            | 1          | 1          |
| <b>Charaxinae</b>                                      | <b>126</b> | <b>41</b>  | <b>167</b> |
| Anaeini                                                | 78         | 1          | 79         |
| <i>Memphis hirta</i> (Weymer, 1907)                    | 17         |            | 17         |
| <i>Memphis moruus</i> (Fabricius, 1775)                | 28         | 1          | 29         |
| <i>Zaretis strigosus</i> (Gmelin, [1790])              | 33         |            | 33         |
| Preponini                                              | 48         | 40         | 88         |
| <i>Archaeoprepona amphimachus</i> (Fabricius, 1775)    | 24         | 9          | 33         |
| <i>Archaeoprepona chalciope</i> (Hübner, [1823])       | 14         | 29         | 43         |
| <i>Archaeoprepona demophon</i> (Linnaeus, 1758)        | 3          | 2          | 5          |

|                                                        |            |            |             |
|--------------------------------------------------------|------------|------------|-------------|
| <i>Archaeoprepona demophoon</i> (Hübner, [1814])       | 1          |            | 1           |
| <i>Prepona pylene</i> Hewitson, [1854]                 | 6          |            | 6           |
| <b>Nymphalinae</b>                                     | <b>5</b>   |            | <b>5</b>    |
| Coeini                                                 | 5          |            | 5           |
| <i>Smyrna blomfildia</i> (Fabricius, 1781)             | 5          |            | 5           |
| <b>Satyrinae</b>                                       | <b>391</b> | <b>737</b> | <b>1128</b> |
| Brassolini                                             | 11         | 168        | 179         |
| <i>Blepolenis bassus</i> (C. Felder & R. Felder, 1867) | 5          |            | 5           |
| <i>Blepolenis batea</i> (Hübner, [1821])               | 2          |            | 2           |
| <i>Caligo martia</i> (Godart, [1824])                  |            | 6          | 6           |
| <i>Catoblepia amphirhoe</i> (Hübner, [1825])           | 1          |            | 1           |
| <i>Eryphanis reevesii</i> (E. Doubleday, [1849])       | 1          | 91         | 92          |
| <i>Narope cyllastros</i> E. Doubleday, [1849]          |            | 2          | 2           |
| <i>Ooptera fruhstorferi</i> (Röber, 1896)              |            | 69         | 69          |
| <i>Opsiphanes quiteria</i> (Stoll, 1780)               | 2          |            | 2           |
| Morphini                                               | 2          | 66         | 68          |
| <i>Morpho aega</i> (Hübner, [1822])                    |            | 1          | 1           |
| <i>Morpho epistrophus</i> (Fabricius, 1796)            | 2          | 60         | 62          |
| <i>Morpho portis</i> (Hübner, [1821])                  |            | 5          | 5           |
| Satyrini                                               | 378        | 503        | 881         |
| <i>Carminda griseldis</i> (Weymer, 1911)               | 2          | 1          | 3           |
| <i>Carminda paeon</i> (Godart, [1824])                 | 297        | 45         | 342         |
| <i>Eteona tisiphone</i> (Boisduval, 1836)              | 4          |            | 4           |
| <i>Euptychoides castrensis</i> (Schaus, 1902)          | 5          |            | 5           |
| <i>Forsterinaria necys</i> (Godart, [1824])            | 33         | 107        | 140         |

|                                                   |            |            |             |
|---------------------------------------------------|------------|------------|-------------|
| <i>Forsterinaria pronophila</i> (A. Butler, 1867) | 20         | 15         | 35          |
| <i>Forsterinaria quantius</i> (Godart, [1824])    | 2          | 114        | 116         |
| <i>Hermeuptychia</i> sp. Forster, 1964            | 2          | 1          | 3           |
| <i>Paryphthimoides grimon</i> (Godart, [1824])    | 6          | 1          | 7           |
| <i>Praepedaliodes phanias</i> (Hewitson, 1862)    | 7          | 3          | 10          |
| <i>Pseudodebis ypthima</i> Hübner, [1821]         |            | 216        | 216         |
| <b>Total</b>                                      | <b>563</b> | <b>784</b> | <b>1347</b> |

---

**Table S2.** Relationship between environmental variables and vertical stratum for a subtropical forest in the Rio Grande do Sul State, southern Brazil, considering the day and night periods (day = between 8h00min and 18h00min; night = 18h30min to 7h30min). The estimated parameters were calculated by linear models (OLS) and represent effects parametrization. Bold values indicate a significative difference (considering a threshold of  $p < 0.05$ ) between strata for each environmental variable evaluated. SE – Standard error.

| Environmental variable | Daytime    |          |       |         |                | Nighttime |       |         |                |
|------------------------|------------|----------|-------|---------|----------------|-----------|-------|---------|----------------|
|                        | Strata     | Estimate | SE    | t value | p              | Estimate  | SE    | t value | p              |
| Mean Temperature       | Canopy     | 0.586    | 0.125 | 4.679   | <b>1.1E-05</b> | 0.001     | 0.155 | 0.007   | 0.994          |
|                        | Understory | -1.173   | 0.177 | -6.617  | <b>3.5E-09</b> | -0.002    | 0.220 | -0.011  | 0.992          |
| Temperature variation  | Canopy     | 0.477    | 0.136 | 3.500   | <b>7.5E-04</b> | 0.218     | 0.151 | 1.436   | 0.155          |
|                        | Understory | -0.954   | 0.193 | -4.950  | <b>3.9E-06</b> | -0.435    | 0.214 | -2.031  | <b>0.045</b>   |
| Mean Humidity          | Canopy     | -0.830   | 0.085 | -9.712  | <b>2.8E-15</b> | -0.411    | 0.141 | -2.905  | <b>0.005</b>   |
|                        | Understory | 1.660    | 0.121 | 13.735  | <b>5.7E-23</b> | 0.821     | 0.200 | 4.109   | <b>9.4E-05</b> |
| Humidity variation     | Canopy     | 0.711    | 0.108 | 6.554   | <b>4.6E-09</b> | 0.518     | 0.132 | 3.913   | <b>1.9E-04</b> |
|                        | Understory | -1.422   | 0.153 | -9.269  | <b>2.1E-14</b> | -1.037    | 0.187 | -5.534  | <b>3.7E-07</b> |
